# Supplementary material for: PPP6R2 is a Novel Candidate Gene for Developmental Dysplasia of the Hip as Revealed by Whole Exome Sequencing of 29 Families of Danish Descent
Source: Research Square preprint supplement (doi:10.21203/rs.3.rs-1038868/v1), 2021-11-08
Supplement: Supplementary file 1 [file 37eb2f2f5e82f30ad11ec9a0.xlsx]

## Sheet: Ark1
Supplementary Table 2. Variant type distribution
Description	Cases	Percentage(%)
5_prime_UTR_premature_start_codon_gain_variant	9	0.270108
initiator_codon_variant	4	0.120048
splice_acceptor_variant	16	0.480192
splice_donor_variant	16	0.480192
splice_region_variant	40	1.20048
stop_lost	4	0.120048
stop_gained	75	2.2509
stop_retained_variant	4	0.120048
frameshift_variant	70	2.10084
disruptive_inframe_deletion	3	0.090036
inframe_deletion	51	1.53061
inframe_insertion	15	0.45018
missense_variant	3025	90.7863
Total	3332
Whole Exome Sequencing of 29 families with developmental hip dysplasia reveals mechanotransduction is involved in the etiopathogenesis of the disease.
Human Genetics.
M. Dembic, L. van B. Andersen, M. J. Larsen, I. Mechlenburg, K. Søballe, J. Hertz.
Corresponding author: Maja Dembic, Maja.Dembic@rsyd.dk, Odense University Hospital, J.B. Winsløws Vej 4, 5000 Odense C, Denmark.
