# Supplementary material for: PPP6R2 is a Novel Candidate Gene for Developmental Dysplasia of the Hip as Revealed by Whole Exome Sequencing of 29 Families of Danish Descent
Source: Research Square preprint supplement (doi:10.21203/rs.3.rs-1038868/v1), 2021-11-08
Supplement: Supplementary file 3 [file 83bde42a153e3f6bfabaf480.xlsx]

## Sheet: CNV variants
Supplementary Table 4. List of CNVs
Family	Region	CNVs affecting the following genes	Gain/Loss	Frequency in GnomAD	Notes
Family 1	4:186510833-187209768	CYP4V2,F11,FAM149A,KLKB1,SORBS2,TLR3	Duplication	NA
	19:4219588-4224502	ANKRD24	Duplication	0.02	Exons 19 -22
Family 17	3:49321420-49343321	USP4	Het deletion	NA	11 exons deleted
Family 18	17:58499954-58504178	C17orf64	Het deletion	NA
Family 22	19:4219588-4224502	ANKRD24	Duplication	0.02	Exons 19 -22
Family 26	13:114128439-114277601	DCUN1D2, TFDP1, TMCO3	Duplication	9,21914 e -05
	19:17443739-17450408	ANO8, GTBP3	Duplication	0
Family 27	2:228194462-228205096	MFF	Duplication	NA
	6:34385283-34392998	RPS10, NUDT3	Duplication	0.000184383
	8:29921404-29927575	SARAF	Duplication	NA
Family 31	15:41853325-41870474	TYRO3	Duplication	NA
Family 32	X:152100216-152110374	ZNF185	Het Deletion	0.00018486
Whole Exome Sequencing of 29 families with developmental hip dysplasia reveals mechanotransduction is involved in the etiopathogenesis of the disease.
Human Genetics.
M. Dembic, L. van B. Andersen, M. J. Larsen, I. Mechlenburg, K. Søballe, J. Hertz.
Corresponding author: Maja Dembic, Maja.Dembic@rsyd.dk, Odense University Hospital, J.B. Winsløws Vej 4, 5000 Odense C, Denmark.
